# Supplementary material for: Haemoglobin transfusion threshold in traumatic brain injury optimisation (HEMOTION): a multicentre, randomised, clinical trial protocol
Source: PubMed Central journal article supplement — BMJ Open. 2022 Oct 10;12(10):e067117. doi: 10.1136/bmjopen-2022-067117 (PMC9557781; doi:10.1136/bmjopen-2022-067117), 2022-10-10
Supplement: bmjopen-2022-067117.reviewer_comments.pdf [file bmjopen-2022-067117.reviewer_comments.pdf]

## PEER REVIEW HISTORY

BMJ Open publishes all reviews undertaken for accepted manuscripts. Reviewers are asked to complete a checklist review form (<http://bmjopen.bmj.com/site/about/resources/checklist.pdf>) and are provided with free text boxes to elaborate on their assessment. These free text comments are reproduced below.

## ARTICLE DETAILS

|                            |                                                                                                                                                                                                                                                                                                                                                                                                                                                                                                                                   |
|----------------------------|-----------------------------------------------------------------------------------------------------------------------------------------------------------------------------------------------------------------------------------------------------------------------------------------------------------------------------------------------------------------------------------------------------------------------------------------------------------------------------------------------------------------------------------|
| <b>TITLE (PROVISIONAL)</b> | Hemoglobin transfusion threshold in traumatic brain injury optimization (HEMOTION): a multicenter, randomized, clinical trial protocol                                                                                                                                                                                                                                                                                                                                                                                            |
| <b>AUTHORS</b>             | Turgeon, Alexis; Fergusson, Dean; Clayton, Lucy; Patton, Marie-Pier; Zarychanski, Ryan; English, Shane; Docherty, Annemarie; Walsh, Timothy; Griesdale, Donald; Kramer, Andreas H.; Scales, Damon; Burns, Karen; Boyd, John; Marshall, John; Kutsogiannis, Demetrios J; Ball, Ian; Hébert, Paul; Lamontagne, Francois; Costerousse, Olivier; St-Onge, Maude; Lessard-Bonaventure, Paule; Moore, Lynne; Neveu, Xavier; Rigamonti, Andrea; Khwaja, Kosar; Green, Robert; Laroche, Vincent; Fox-Robichaud, Alison; Lauzier, Francois |

This article was not externally reviewed at BMJ Open. Protocols that have been independently assessed prior to submission to BMJ Open are usually fast-tracked to publication on the grounds that further substantial changes will not be possible. This independent assessment will usually be external, independent review for both a substantial grant award from a non-commercial or government funder and ethics approval.
