# Supplementary material for: Haemoglobin transfusion threshold in traumatic brain injury optimisation (HEMOTION): a multicentre, randomised, clinical trial protocol
Source: PubMed Central journal article supplement — BMJ Open. 2022 Oct 10;12(10):e067117. doi: 10.1136/bmjopen-2022-067117 (PMC9557781; doi:10.1136/bmjopen-2022-067117), 2022-10-10
Supplement: bmjopen-2022-067117supp006.pdf [file bmjopen-2022-067117supp006.pdf]

## Appendix 6 : Protocol Revision History

| Version Number | Summary of Revisions Made                                                                                                                                                                                                                                                                                                                                                                                                                                                                                                                                                                                                                                                                                                                                                                                                                                                                                                                                                                                                                                                                                                                                                                                  | Version Date  |
|----------------|------------------------------------------------------------------------------------------------------------------------------------------------------------------------------------------------------------------------------------------------------------------------------------------------------------------------------------------------------------------------------------------------------------------------------------------------------------------------------------------------------------------------------------------------------------------------------------------------------------------------------------------------------------------------------------------------------------------------------------------------------------------------------------------------------------------------------------------------------------------------------------------------------------------------------------------------------------------------------------------------------------------------------------------------------------------------------------------------------------------------------------------------------------------------------------------------------------|---------------|
| 1.0            | n/a                                                                                                                                                                                                                                                                                                                                                                                                                                                                                                                                                                                                                                                                                                                                                                                                                                                                                                                                                                                                                                                                                                                                                                                                        | July 11, 2017 |
| 2.0            | <ul style="list-style-type: none"> <li>• Addition of the Clinical trials.gov registration number</li> <li>• Correction of typos and wording</li> <li>• Update of the list of abbreviations</li> <li>• Precision regarding one exclusion criteria (fixed <u>bilateral</u> dilated pupils)</li> <li>• Modification to the size of permuted blocks for randomization (4 and 6 instead of 2 and 4)</li> <li>• Update of the list of participating sites and anticipated recruitment rate</li> <li>• Modification of the interim analysis (one analysis at 50% enrolment instead of 2 analyses at one third and two thirds)</li> <li>• Modification of the time frame to report protocol violations at the Coordinating Centre (72 hours instead of 96 hours)</li> </ul>                                                                                                                                                                                                                                                                                                                                                                                                                                        | Nov 22, 2017  |
| 3.0            | <ul style="list-style-type: none"> <li>• Increase in sample size</li> <li>• Addition of Withdrawal of Life-Sustaining Therapies as a trigger to stop applying the intervention</li> <li>• Addition of the PACT as a collaborative research network</li> <li>• Minor corrections to the text and references</li> <li>• Clarification of secondary and tertiary objectives</li> <li>• Addition of patient minimum age</li> <li>• Clarification of potential protocol violation definitions and management</li> <li>• Precision regarding the start and end of treatment strategy</li> <li>• Modification of the list of participating centres</li> <li>• Increase in recruitment period</li> <li>• Precision on required imaging results</li> <li>• Deletion of one secondary outcome (return to work)</li> <li>• One secondary outcome changed to tertiary outcome (complications related to transfusion)</li> <li>• Modification of the statistical and analytic plan for the primary outcome, of subgroup and sensitivity analyses</li> <li>• Modification to how follow-ups are organized</li> <li>• Update of References</li> <li>• Update of Steering Committee members and Knowledge users</li> </ul> | May 17, 2022  |
